# Supplementary material
Source: PubMed Central journal article supplement (PMC4875806)
Supplement: NIHMS753700-supplement.pdf [file NIHMS753700-supplement.pdf]

- S1. The variable corresponding to the measurement of BMI is the most frequently missing variable in the dataset. To avoid the elimination of all records with a missing BMI value, multiple imputation was used to impute the categorical BMI values for these missing cases.<sup>29-32</sup> All of the sociodemographic variables, including the individual's sex-race-sexual identity, age, educational attainment, marital status, and Hispanic and foreign born status, were used as explanatory variables in the imputation equation, and 50 imputations were carried out. The imputation, the estimation of the ordered logit and logistic regression equations using the multiply imputed data, and the testing of the coefficients from the estimated regression were all carried out using the *mi* functions in Stata 13. Although all results that are reported are based on the imputed dataset, results from analyses which exclude (rather than impute) the missing BMI values are quite similar to those reported.
- S2. Functional limitation is an indicator of whether the respondent experiences any difficulty in the following activities: Walking a quarter of a mile, walking up 10 steps without resting, standing for 2 hours, sitting for 2 hours, stooping/bending/kneeling, reaching up over one's head, using fingers to grasp and handle small objects, lifting or carrying something as heavy as 10 pounds, pushing or pulling large objects, going out for shopping/movies/sporting events, participating in social activities, and doing things to relax at home or for leisure.
- S3. Current infrequent indicates that the respondent has had 12 or more drinks in her/his lifetime and 1-11 drinks in the past year; current light indicates that the respondent has had 12 or more drinks in her/his lifetime and fewer than four drinks per week in the past year; current

**Appendix**  
**Sexual Minority Health and Health Risk Factors: Intersection Effects of Gender, Race, and Sexual Identity**  
**Hsieh and Ruther**

moderate indicates that the respondent has had 12 or more drinks in her/his lifetime and between 4 and 14 drinks per week in the past year (for males) or between 4 and 7 drinks per week in the past year (for females); current heavy indicates that the respondent has had 12 or more drinks in her/his lifetime and more than 14 drinks per week in the past year (for males) or more than 7 drinks per week in the past year (for females).
